# Supplementary material
Source: HighWire-hosted journal article supplement (https://bmjmedicine.bmj.com/highwire/filestream/348/field_highwire_adjunct_files/4/bmjmed-2022-000154supp005_data_supplement.pdf)
Supplement: bmjmed-2022-000154supp005_data_supplement.pdf [file bmjmed-2022-000154supp005_data_supplement.pdf]

**Appendix 5:**

Repartition of pooled analyses by number of included trials

| <b>Number of trials per analysis</b> | <b>Number of possible analyses</b> |
|--------------------------------------|------------------------------------|
| 2                                    | 66                                 |
| 3                                    | 220                                |
| 4                                    | 495                                |
| 5                                    | 792                                |
| 6                                    | 924                                |
| 7                                    | 792                                |
| 8                                    | 495                                |
| 9                                    | 220                                |
| 10                                   | 66                                 |
| 11                                   | 12                                 |
| 12                                   | 1                                  |
| Total                                | 4083                               |
